# Supplementary material
Source: PubMed Central journal article supplement (PMC3844081)

# Supplemental Figure 1

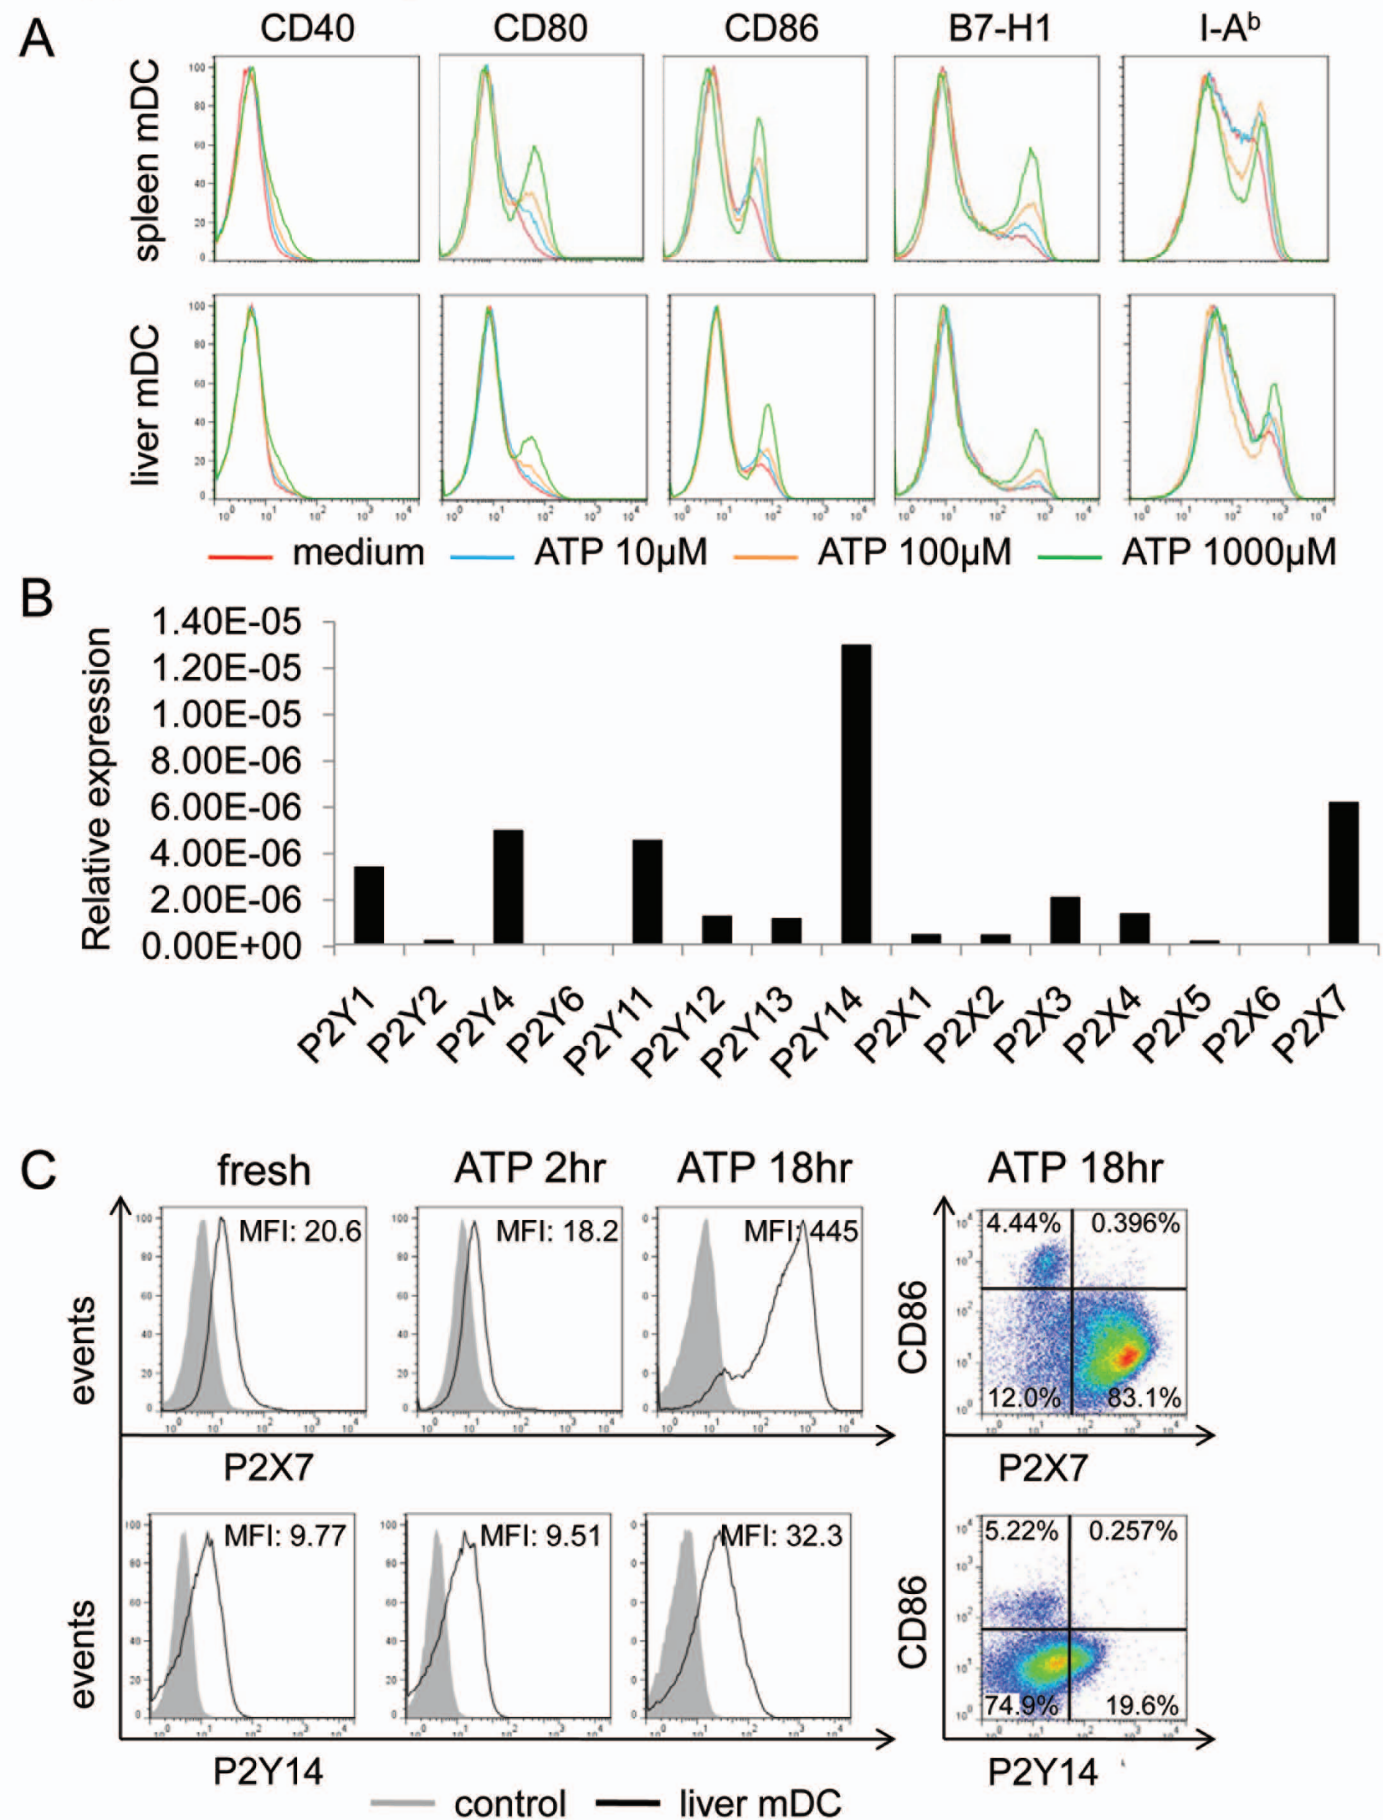

# Supplemental Figure 2

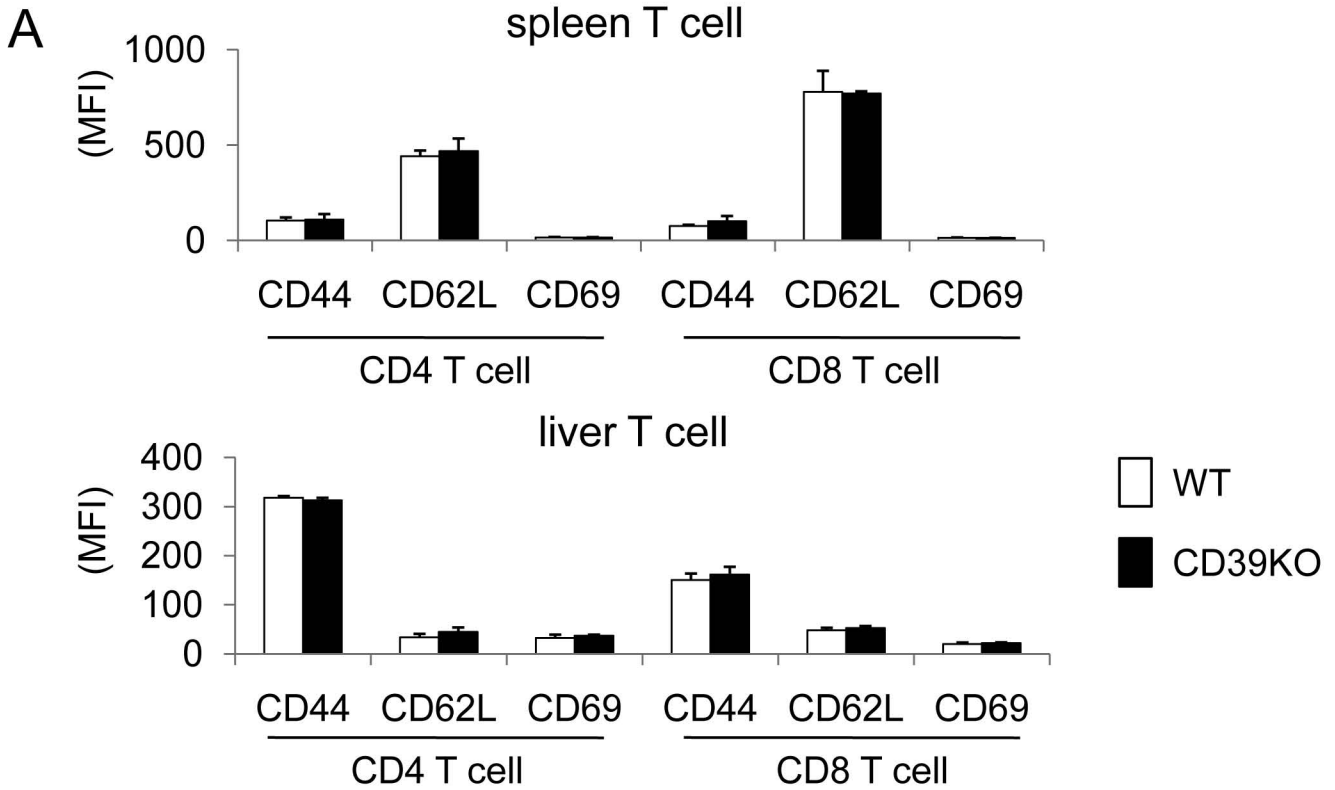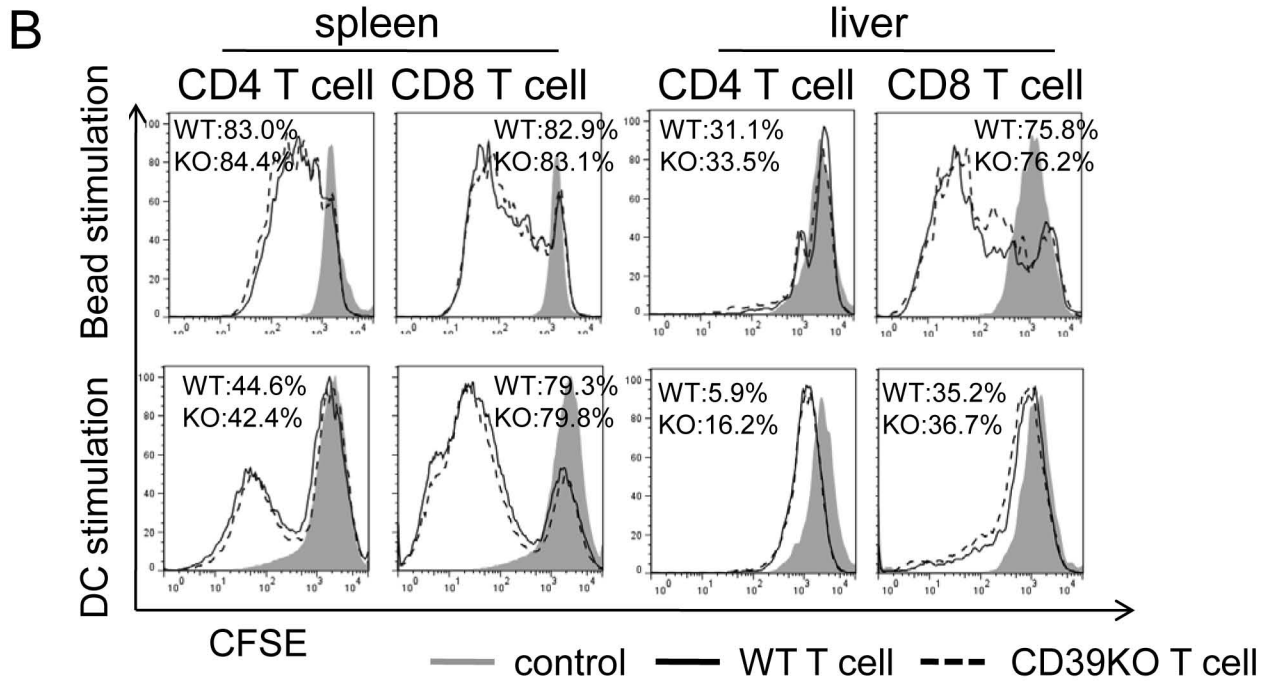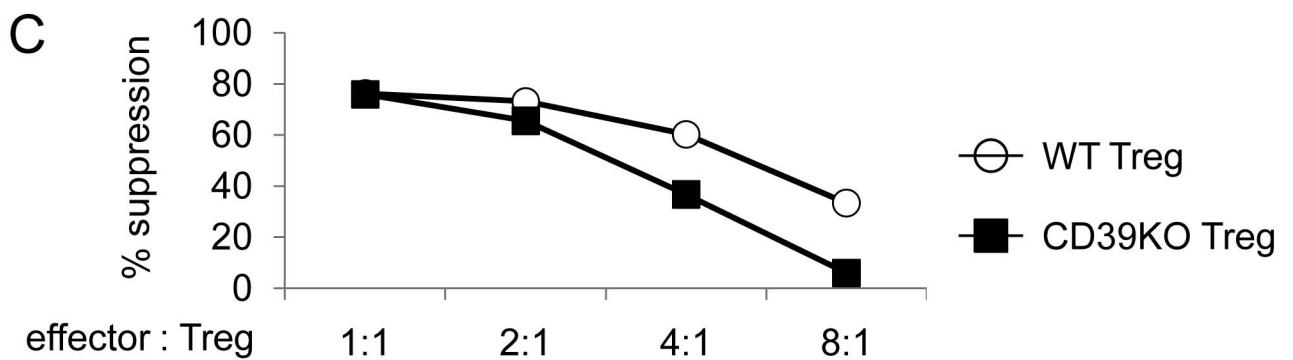

Supplement: NIHMS498749-supplement-Supp_Fig_S1-S2.pdf [file NIHMS498749-supplement-Supp_Fig_S1-S2.pdf]
